# Supplementary material
Source: PubMed Central journal article supplement (PMC3107131)
Supplement: NIHMS292267-supplement-Supplemental_figures_1.pdf [file NIHMS292267-supplement-Supplemental_figures_1.pdf]

! " ## \$ % % & ' & ( ) \* + + , & - & % .

0 " 1\* 2&#(

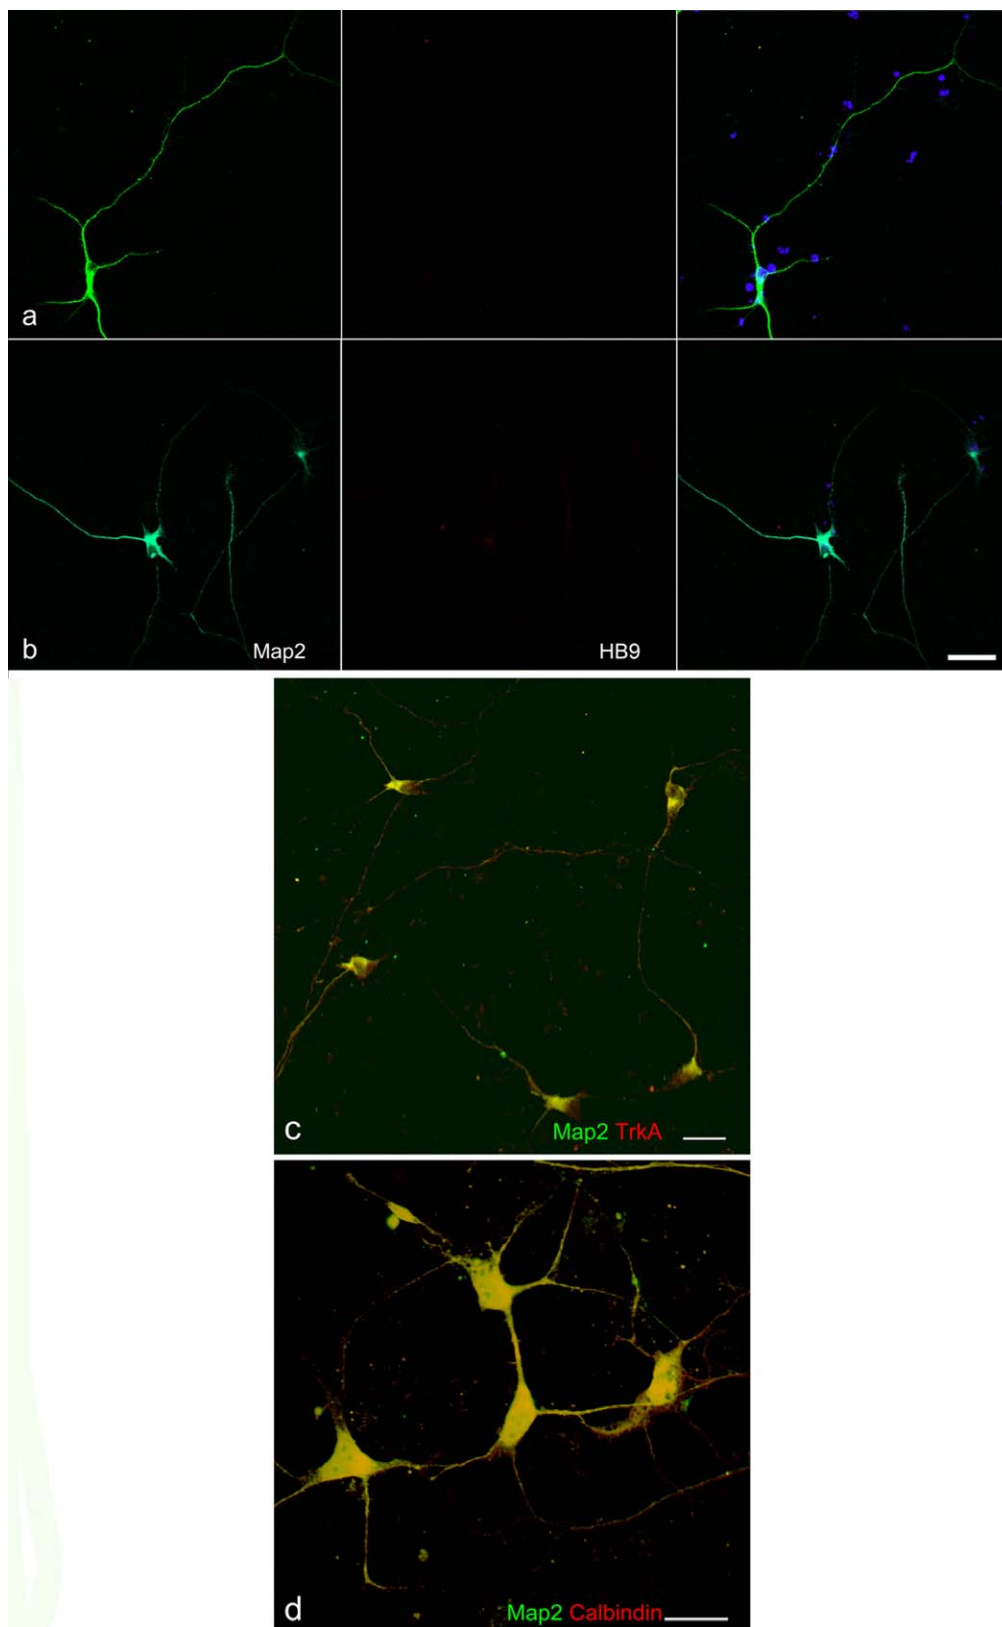

### Supplemental Figure 1 Additional Histochemistry

a,b: At maximum 594nM laser intensity on a confocal microscope, presumptive BFCN generated through BMP9 treatment are not HB9 [HLXB9] immunopositive, indicating that they are not cholinergic motor neurons. Scale bar =20 $\mu$ M

c: Confocal analysis shows the neurons to express high levels of TrkA, a marker specific in the cortex to the BFCN population. Scale bar =20 $\mu$ M

d: Confocal analysis shows the neurons to express high levels of calbindin, a marker expressed in BFCN. Scale bar =20 $\mu$ M

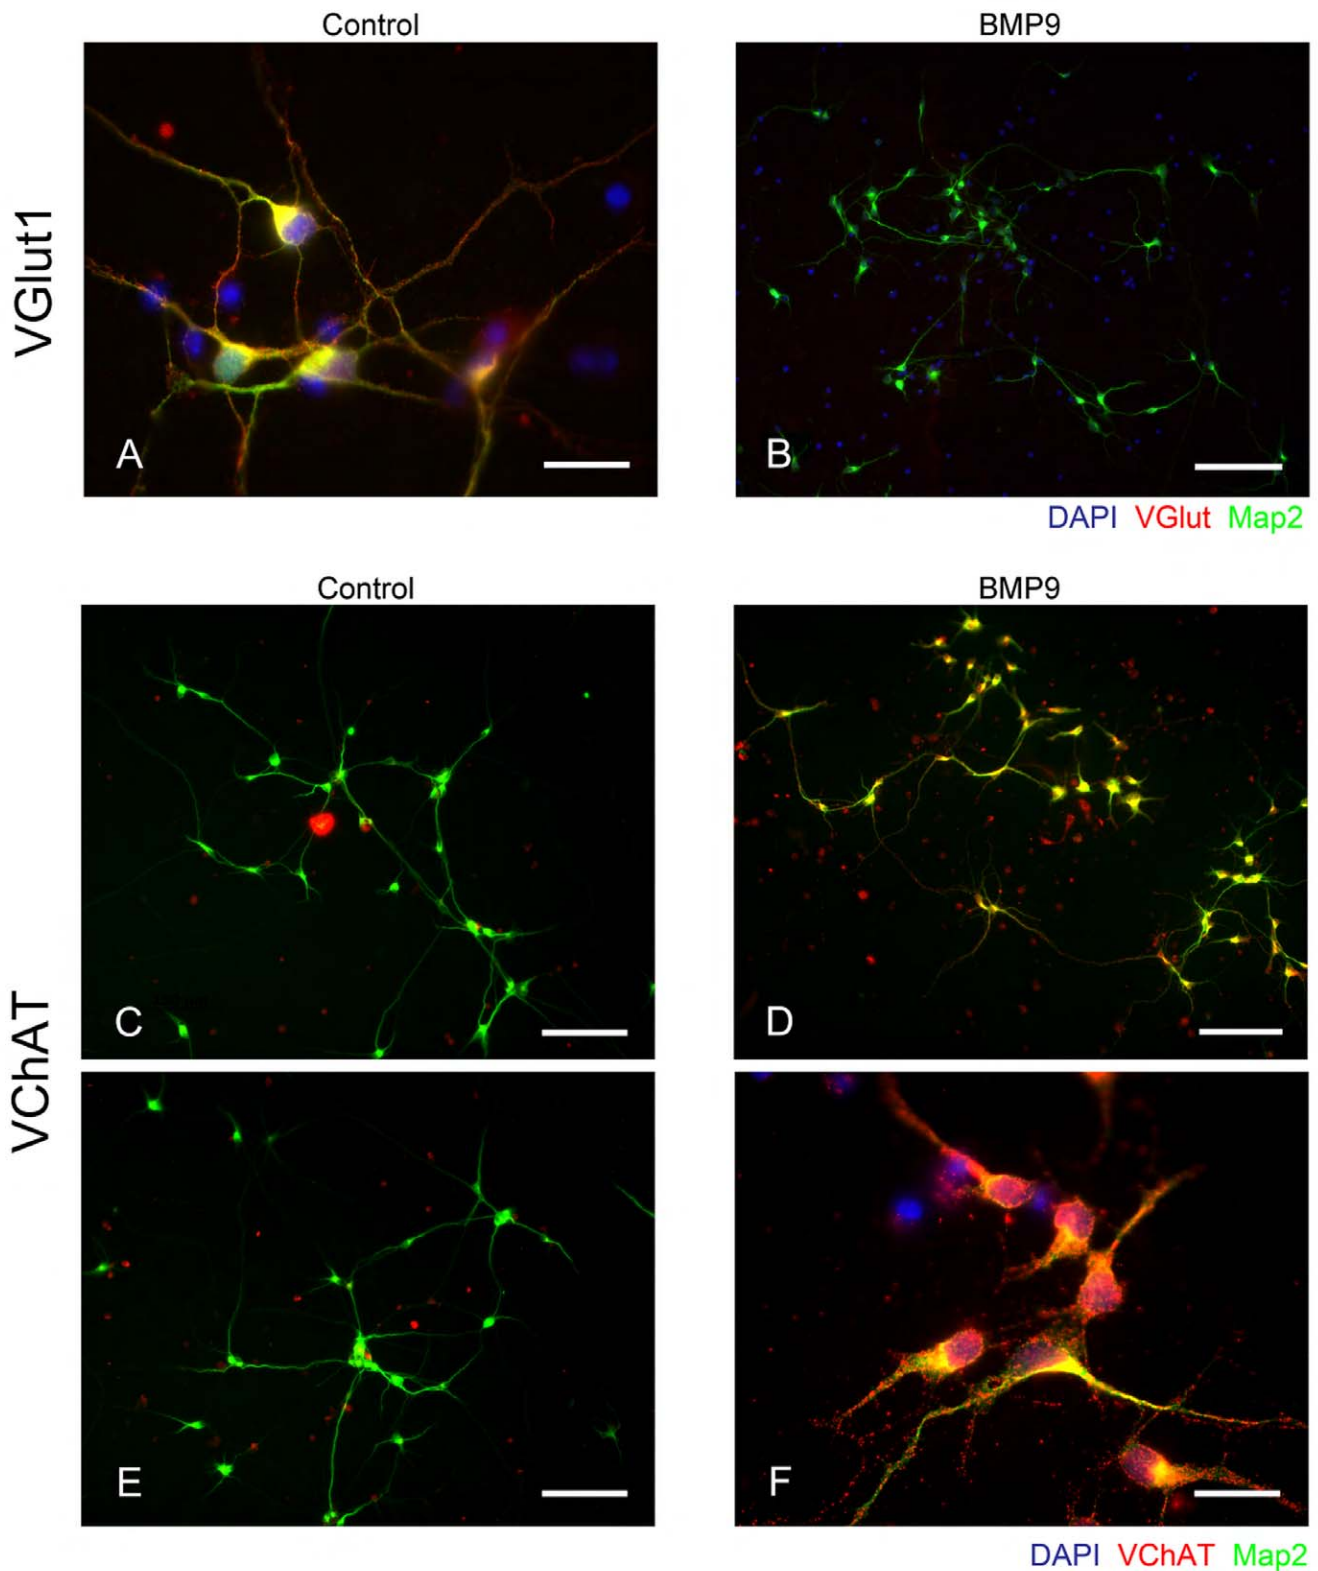

**Supplemental Figure 2 BMP9 signaling changes hNSC-derived neurons from a glutamatergic to cholinergic phenotype**

Control neurons express high levels of VGlut1 [a] but low levels of VChAT [c,e], while 72 hours of 10 ng ml<sup>-1</sup> BMP9 treatment after SHH/FGF8 pretreatment results in an opposite phenotype, with low levels of Vglut1 [b] and high expression of VChAT [d,f]. These data suggest that the control neurons generated in these experiments default to a glutamatergic phenotype, and BMP9 is able to alter this default lineage commitment towards a cholinergic phenotype. Scale bars: a,f= 20μM, b-e = 100μM

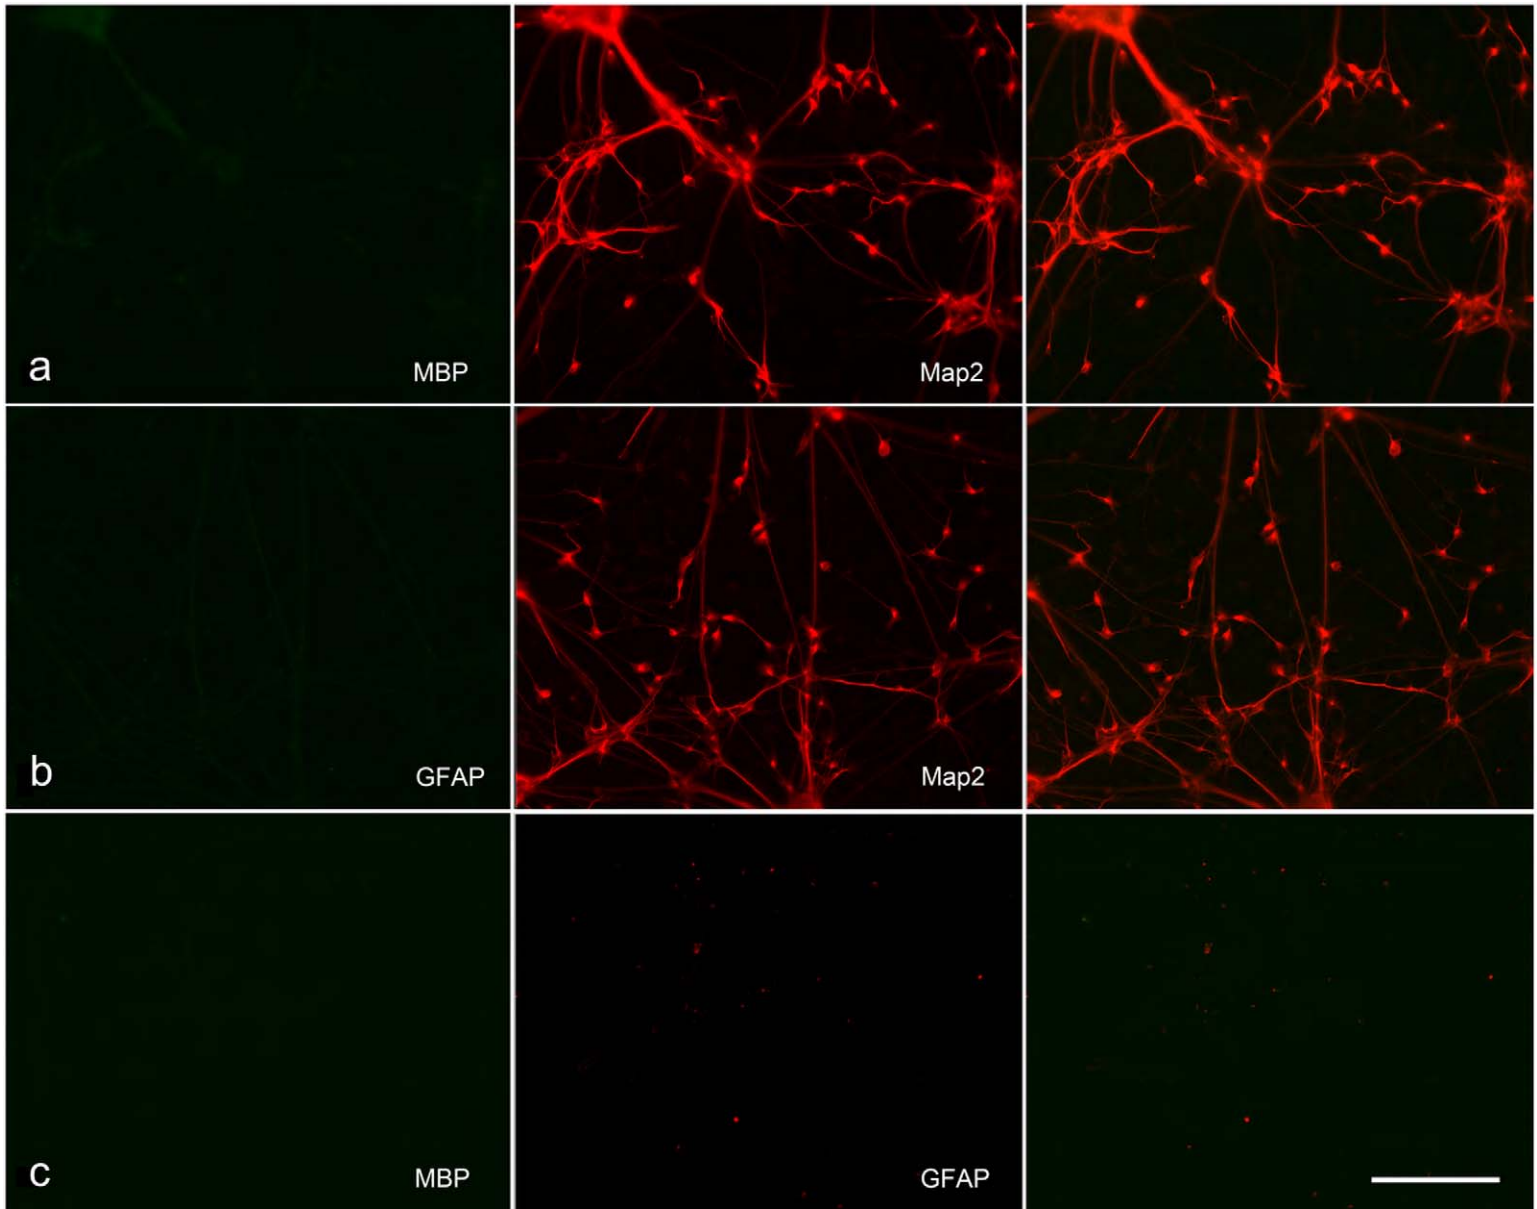

**Supplemental Figure 3 Culture conditions utilized only support neuronal growth**

Combinatorial staining for MBP and MAP2 [a], GFAP and MAP2 [b], or GFAP and MBP [c] show that the cultures generated through the BMP9 treatment paradigm contain only neurons after 16 days in these media conditions, and are free of oligodendroglial [MBP] or astroglial [GFAP] cells. Scale bar =100 $\mu$ M



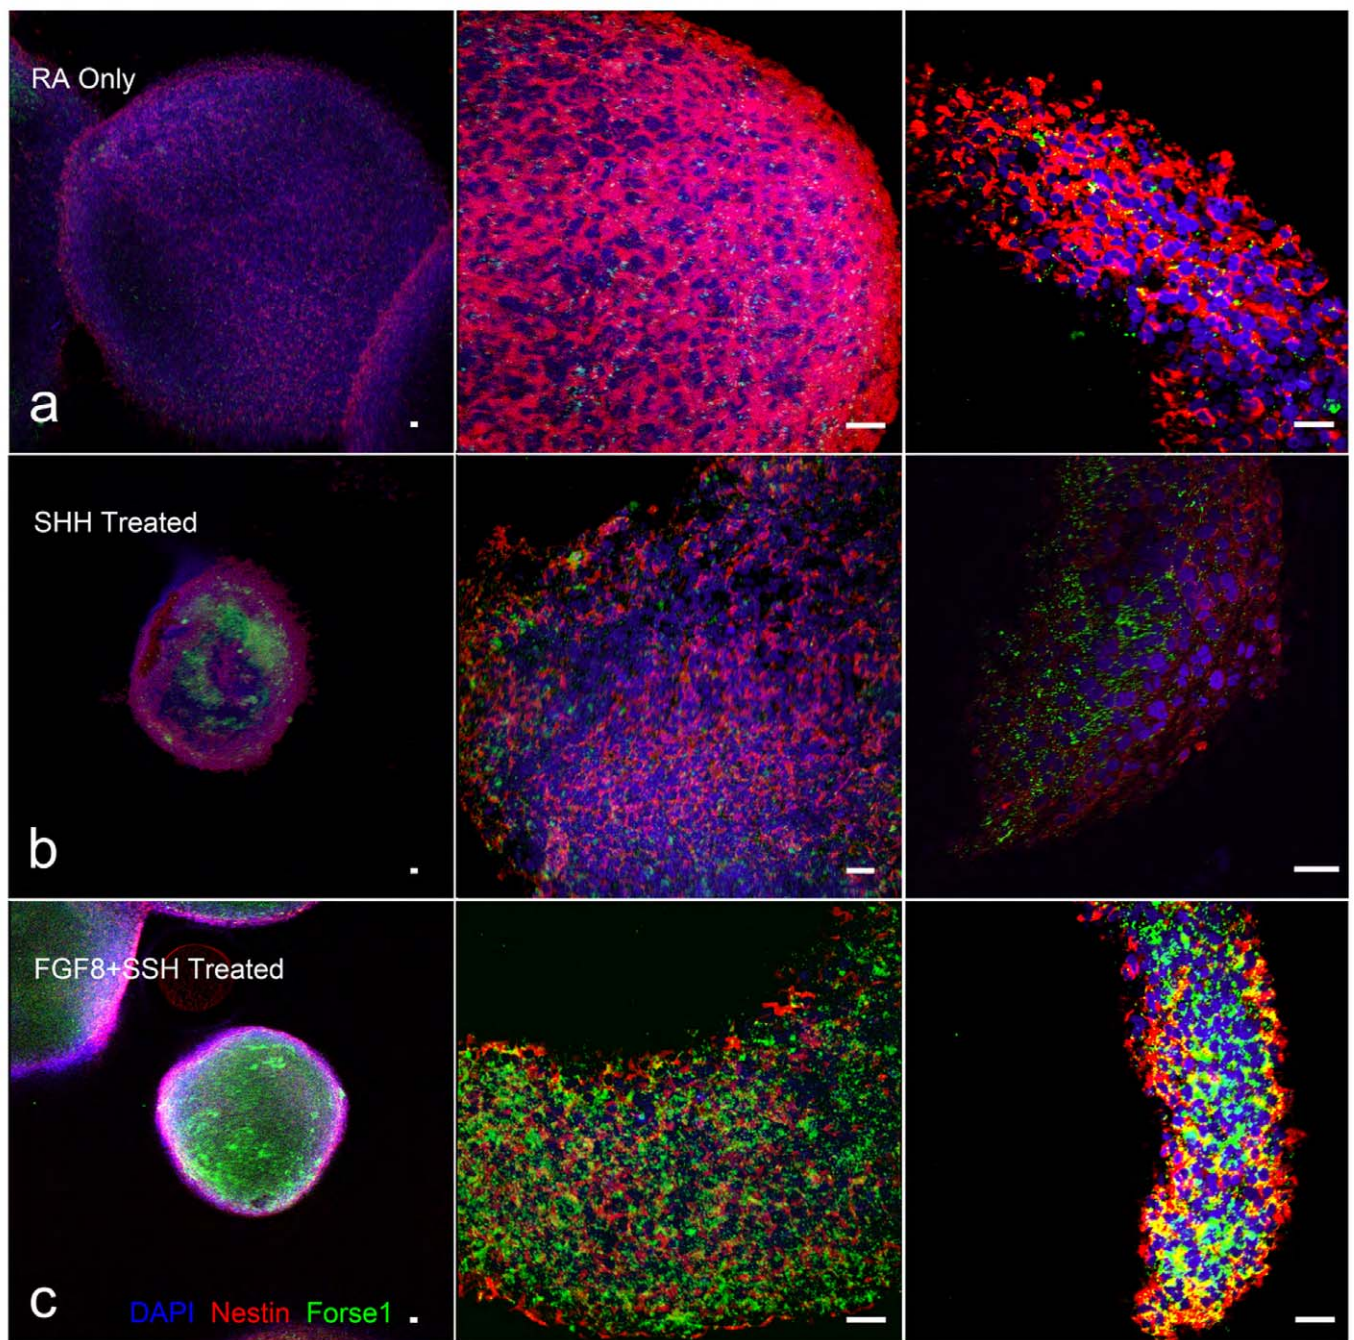

**Supplemental Figure 4 FORSE1 immunohistochemistry demonstrates the generation of forebrain progenitor cells**

FORSE1 is an antibody specific to forebrain progenitor cells which binds to the Le<sup>x</sup> phosphacan, a brain-specific chondroitin sulfate proteoglycan.

a: Neurospheres generated using our culture system are almost uniformly nestin positive [red immunofluorescence], but the control retinoic acid-derived cells do not express FORSE1 [green immunofluorescence], which correlates with their inability to be driven towards a BFCN lineage.

b: Cells pretreated for 72 hours in 200 ng ml<sup>-1</sup> SHH alone show a small increase in FORSE1 staining, and some ability to be made into BFCN [Not Shown].

c: Neurospheres pretreated for 72 hours in 100 ng ml<sup>-1</sup> FGF8 and 200 ng ml<sup>-1</sup> SHH show a marked increase in both FORSE1 expression and the ability to become BFCN [Figures 1,2,4]. Scale bars = 20μM



ATGAGTCCGGAGGGCGACACCCAGCCCGCTGCTCGCCCGCCCTCCTTATGAGAGAG  
 AGGGAGCGCGCGCGGAGCCACACTGCGCGAGCCCGCGCCCGCCACCTCGGCCCG  
 GGAGCCAGGGAGCGAGCCCTGCGTGTCCGCGGGGGCGCCGAGCCCGGGGCGCACGGA  
 GCGCCAGAGAGGAGCGCCCGGGGCGCGCAGCTCCGAACAAGATGCAGCGGGCCGG  
 AGGGGTAGCGCCCTGGGGCAACGGCGGGGGCGCGGGGGCCCGGGCACTGCCTT  
 CTCCATCGACTCCCTAATCGGGCCCGCGCCCGCTCCGGCCACTTGTGTACACCGGC  
 TACCCATGTTTCATGCCCTACCGGCCGCTCGTGTGCCGAGGCGCTGGCCCTGCGCCG  
 TGCCCGTGGCCTCCCGCCCTCGCCCGTAGCCTCTTTCGCGGGCCGCTTACCAACAC  
 CTTCTGCGGGGGCTGGGTACGGCTGTGCCCTCGATGGTGGCGCTGACCACCGCGTGC  
 CAGCTTCGCGGAGCCCGCGAGCTTCTACGGGGCCAGGAGCTCGCCCGCCGCTGCC  
 GCCCGCCCGCCACTGCGCGCCGAAACAACCCGAGCCAGGCGCGCGACGCCAGAGGGT  
 GGGCTGGAAGCTGATGAGCTGTGCCGCGGGAGAAAGTGGCAGAGCCCCACCACCT  
 CCGCCTCCGCACTTCTCAGAGACTTTTCCAAGTCTGCCCGCAGAGGGGAAGGTGTACAG  
 TCAGATGAGGAGAAGCTGGAGGCATCAGCAGGAGACCCAGCAGGAGCGAACAGGAGGA  
 AGAGGGCTCAGGCGGTGACAGCGAGGATGACGTTTCTGGACAGTTCTGCAGGGGGCC  
 AGGGGCTTCTGGGACCTAAACCGAAGCTAAAGGGAAGCCTGGGGACTGGAGCTGAGG  
 AGGGGACCGGTGACAGCAGGGGTACAGCTCCTGGGGGAAAAGCCGACGGCGCCGCA  
 CAGCATTACCAGCGAGCAGCTTTTGAATTGGAGAAGGAATTCATTGCAAGAAATAC  
 CTGAGCTTGACAGAGCGCTCTCAGATCGCCACGCCCTCAAGTCAAGTCAAGTCAAGTCA  
 AAGATCTGGTTTCAGAATCGACGGGCCAAGTGAAGCGCATCAAAGCTGGCAATGTGAG  
 CAGCCGTTCTGGGAGCCCGTAAGAAACCCCAAGATTGTTGTCCCATACTGTGCATGT  
 CAACAGTTTGTGTGCGGAGCCAGCACCAACAATGGAGCAGGGGGCCCGCCCTGA

a

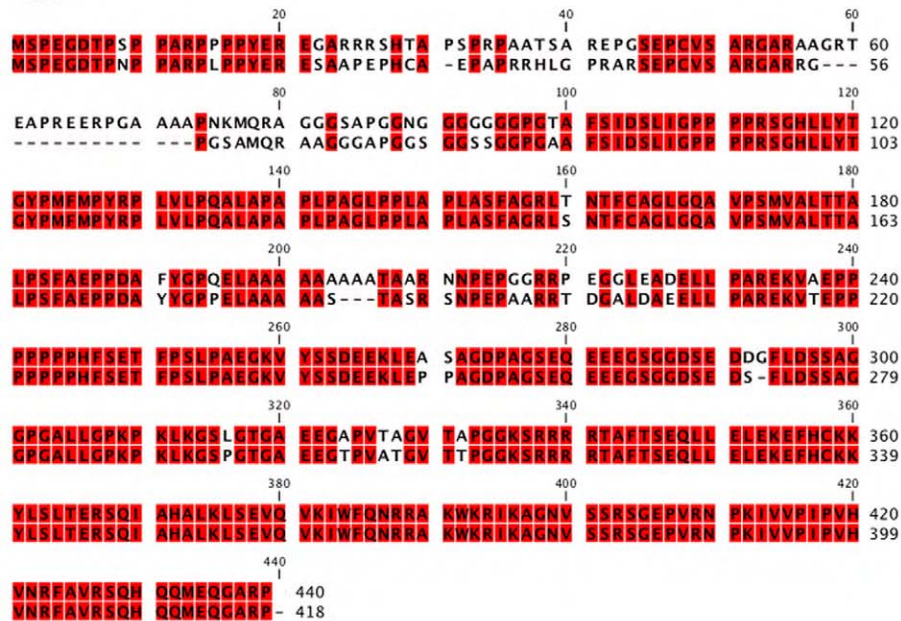

b

**Supplemental Figure 5 Sequence of full length *Gbx1* determined through RACE experiments**

a: Nucleotide sequence of the novel human *Gbx1* sequence

b: The human (upper sequence) and murine (lower sequence) *Gbx1* proteins have a high level of homology

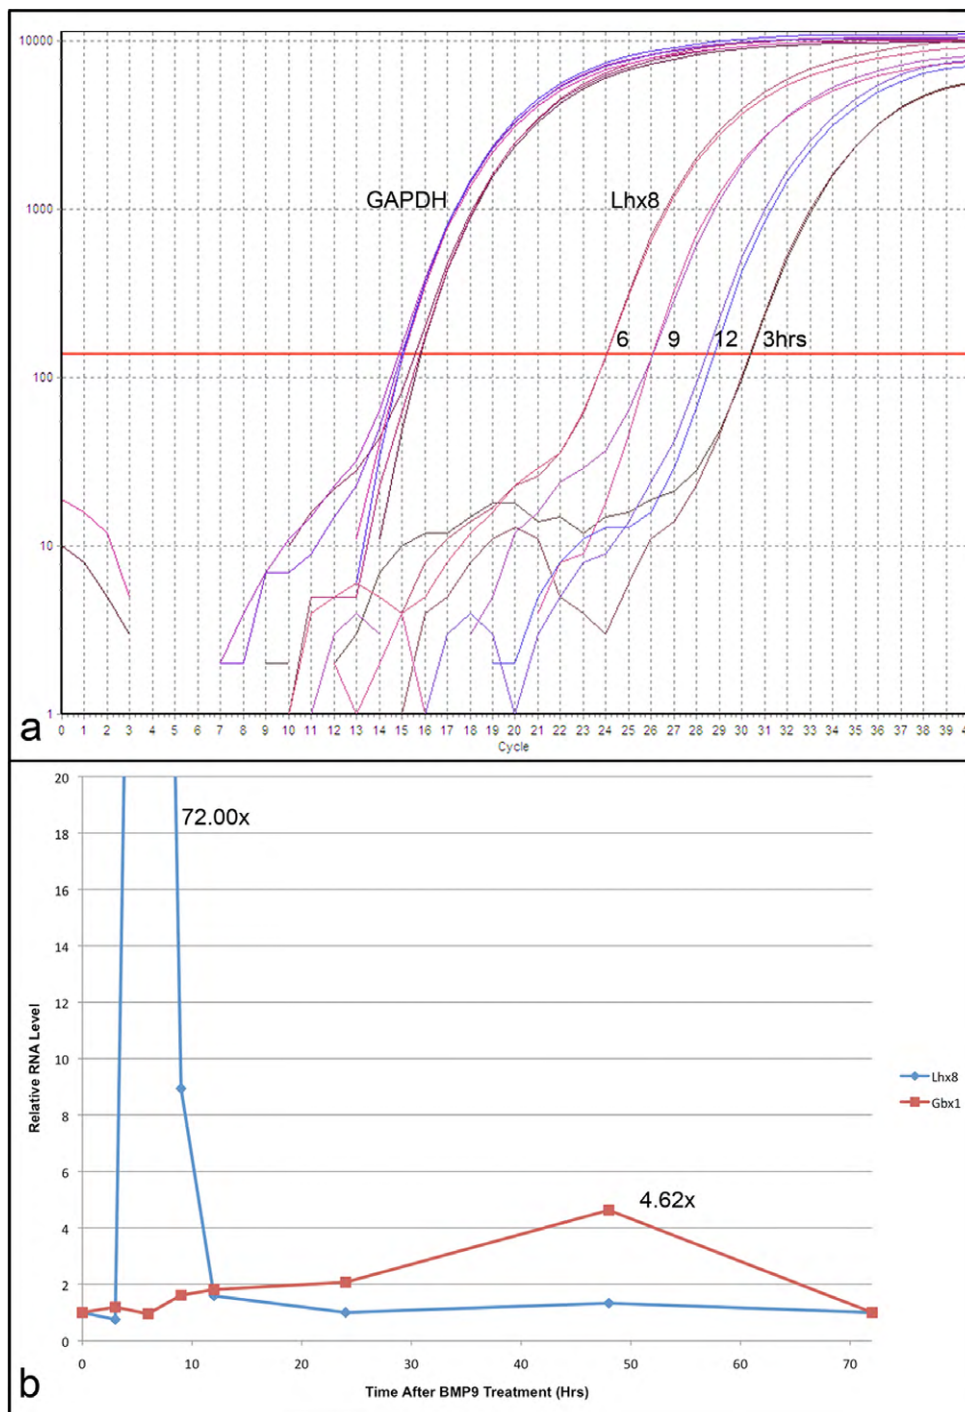

### Supplemental Figure 6 Transcription factor induction following BMP9 treatment

a: Representative qRT-PCR curves showing the distinct upregulation of *Lhx8* expression between 3 and 12 hours after  $10 \text{ ng ml}^{-1}$  BMP9 treatment of human neurospheres.

b: Time course of transcription factor response to BMP9 treatment. *Lhx8* levels increased to 72x baseline at 6 hours, while *Gbx1* levels gradually increased to 4.62x baseline over 48 hours. Related factors, such as *Lhx6* and *Isl1* were unchanged following BMP9 treatment.

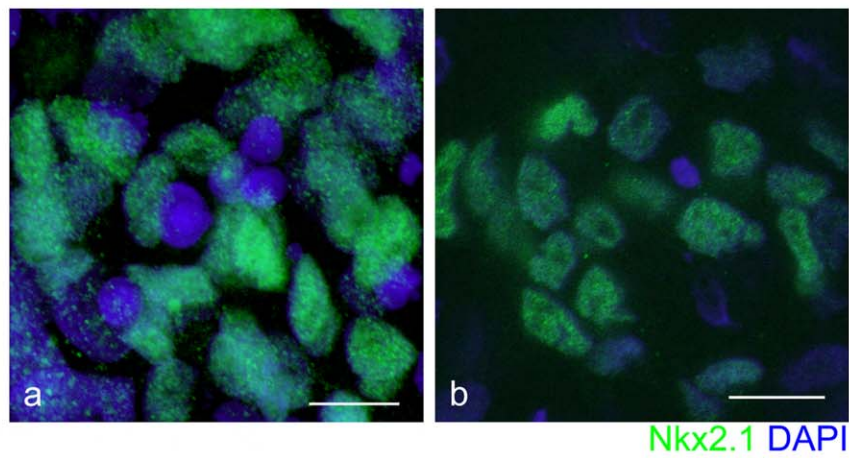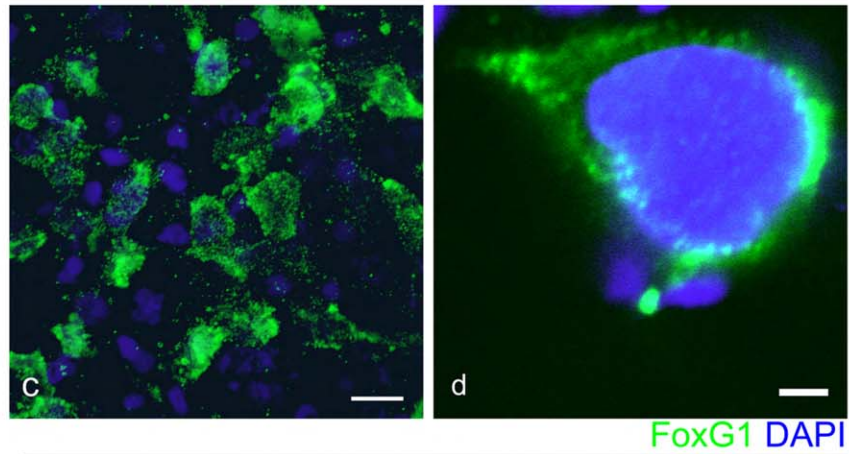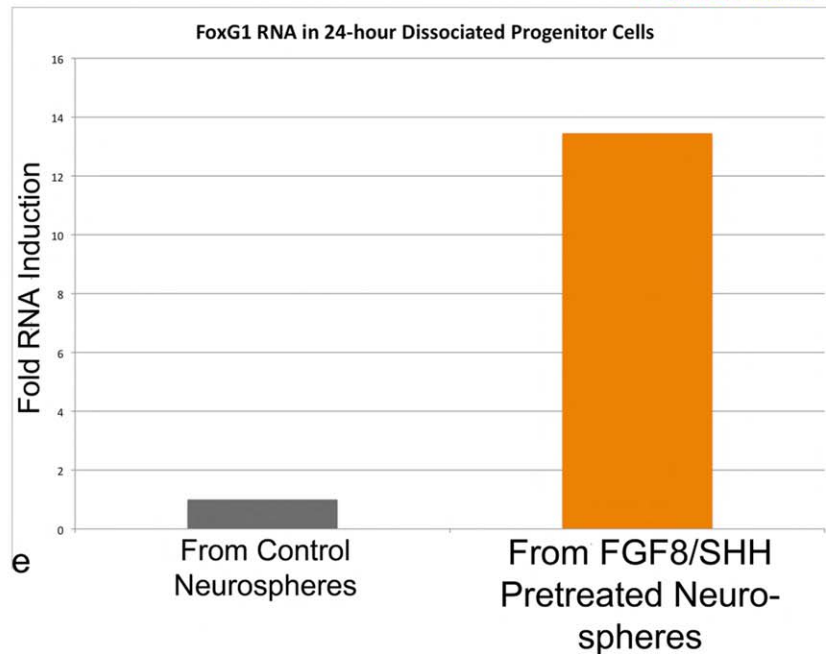

**Supplemental Figure 7 Progenitor populations express additional forebrain-specific markers**

a,b: 24 hours after dissociation neural progenitors pretreated with FGF8 and SHH for 72 hours have high levels of nuclear Nkx2.1 expression. Scale bar =10µM

c: Layered confocal z-stacks show the robust expression of FoxG1 24 hours after the dissociation neural progenitors pretreated with FGF8 and SHH for 72 hours. Scale bar =10µM

d: A closer analysis of single confocal sections clarifies that the FoxG1 expression is properly localized in the perinuclear cytoplasm, as appropriate for differentiating progenitor cells. Scale bar =2µM

e: 24 hours after dissociation neural progenitors pretreated with FGF8 and SHH for 72 hours have far higher levels of *FoxG1* expression than untreated control neural progenitors.



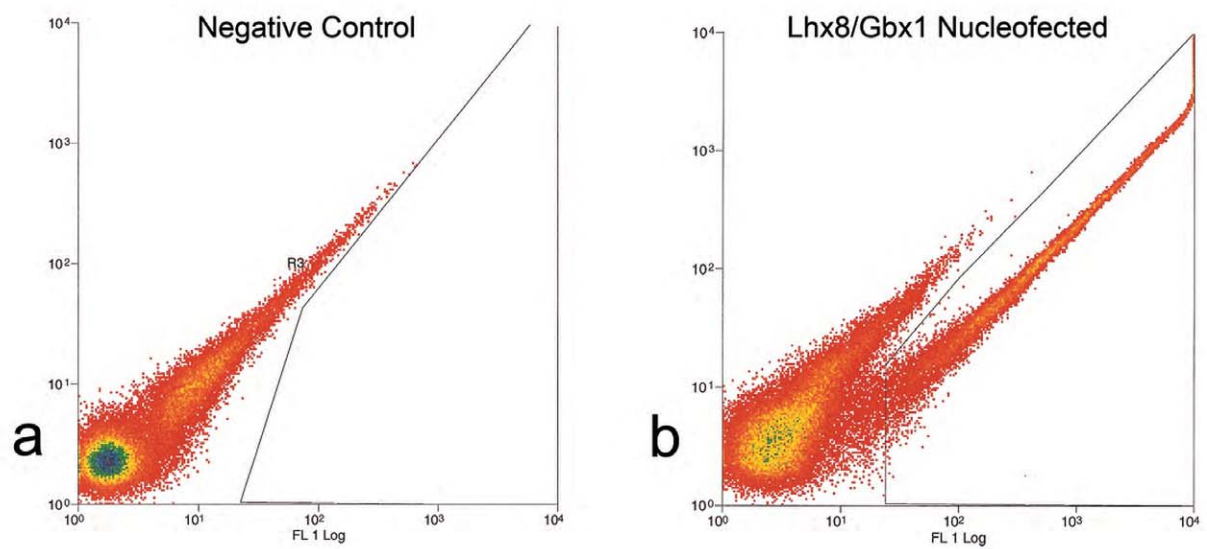

### Supplemental Figure 8 Representative FACS data

After gating to remove debris and doublets, neurons were FACS-purified based on GFP expression; only cells with expression levels markedly above the negative control were kept while minimally-expressing cells were discarded.

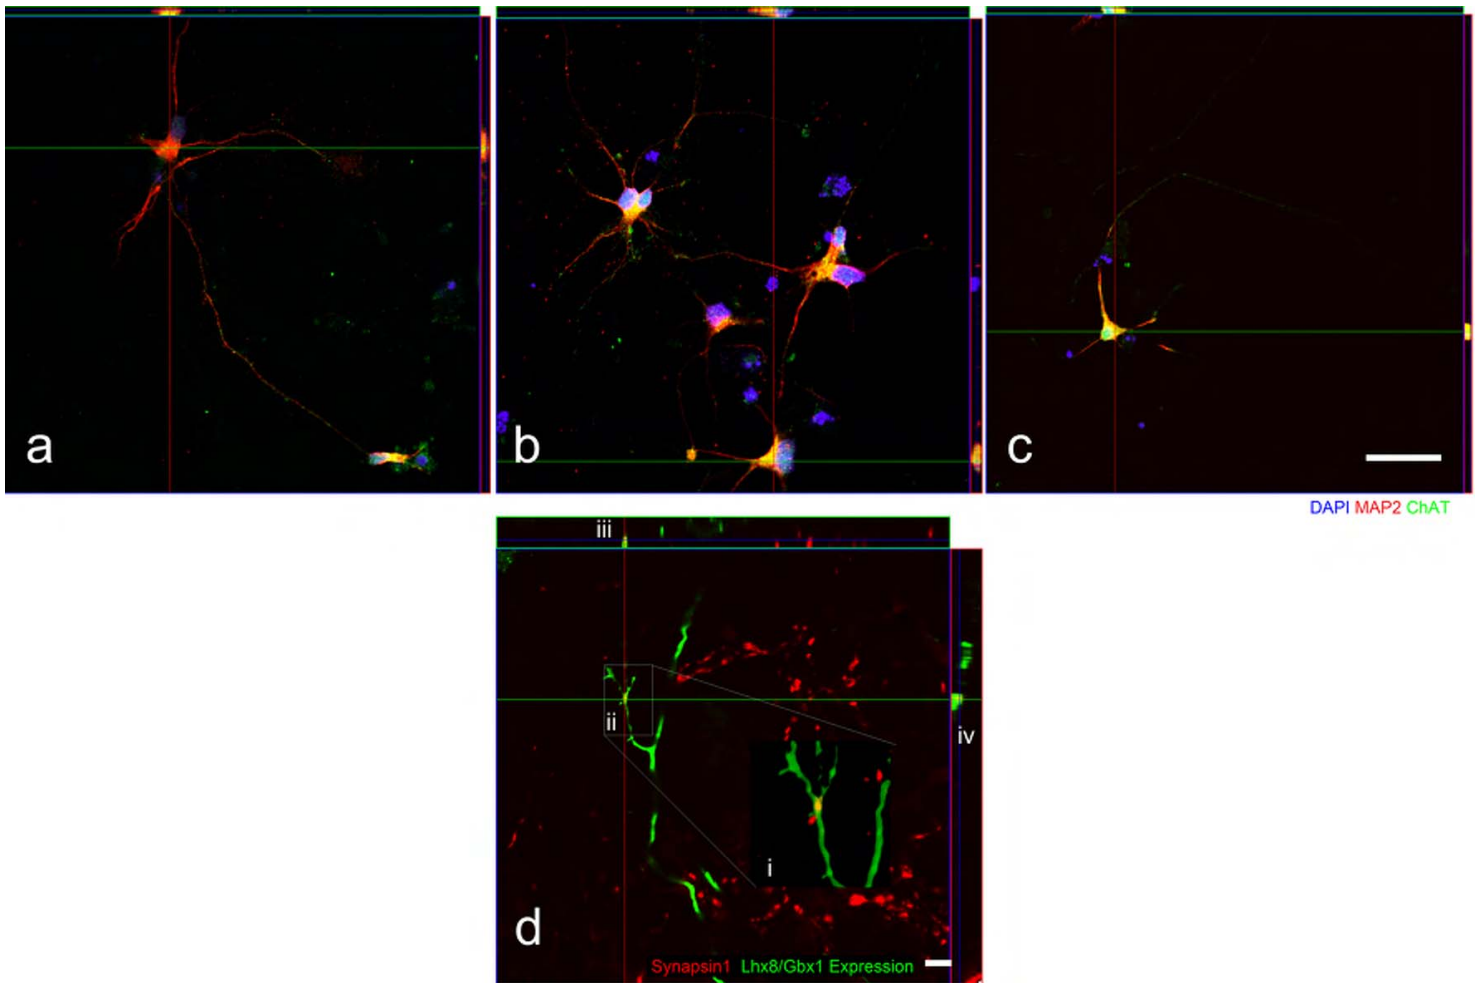

### Supplemental Figure 9 Orthogonal views of z-stacked confocal images

a,b,c: Orthogonal views of z-stacked confocal images indicate ChAT immunopositivity [green channel] is entirely encapsulated within MAP2 immunopositivity [red channel], demonstrating that ChAT immunopositivity is localized within the neurons and is neither background staining within the cells nor on their surface [side/top bar beside each image]. Scale bar = 20 $\mu$ M

d: An orthogonal view of z-stacked confocal images confirms the generation of presynaptic terminals in nucleofected neurons expressing *Lhx8* and *Gbx1* after engrafting into murine hippocampal slice cultures. An enlarged and flattened rendering (i) of a synapse (ii), showing the total inclusion of synapsin1 within the axon. Inclusion is confirmed with individual x-axis (iii) and y-axis (iv) renderings of the synapse showing complete overlap of the punctate synapsin1 staining [red channel] within the eGFP-expressing engrafted axon. Scale bar = 5 $\mu$ M.

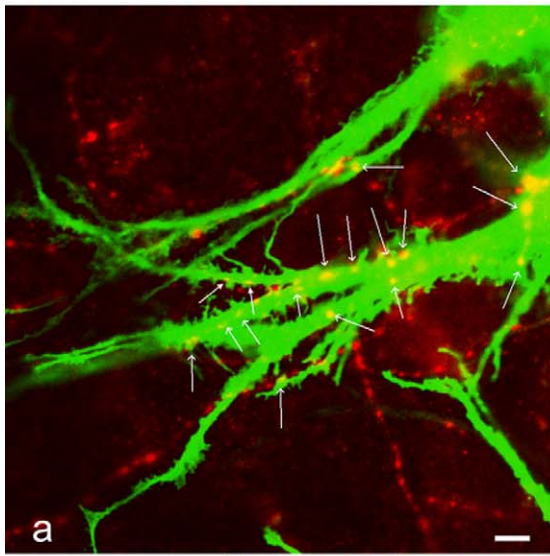

Synaptotagmin1

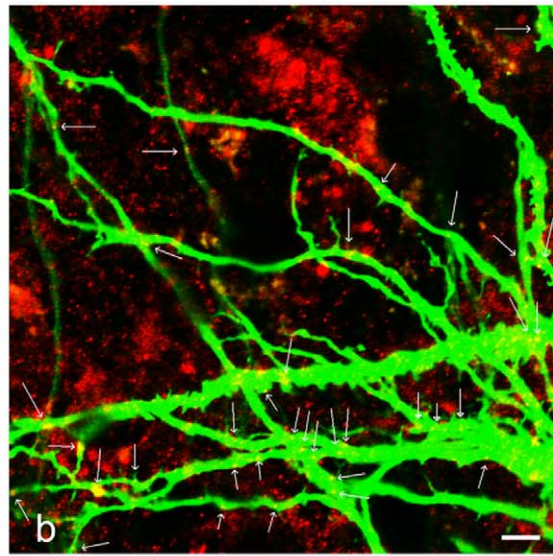

Synaptophysin1

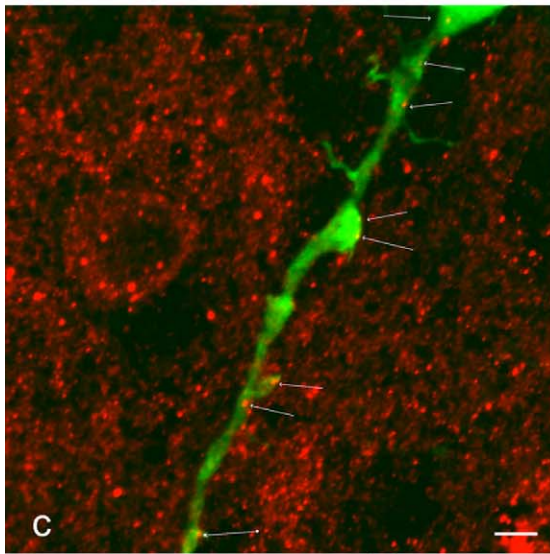

Bassoon

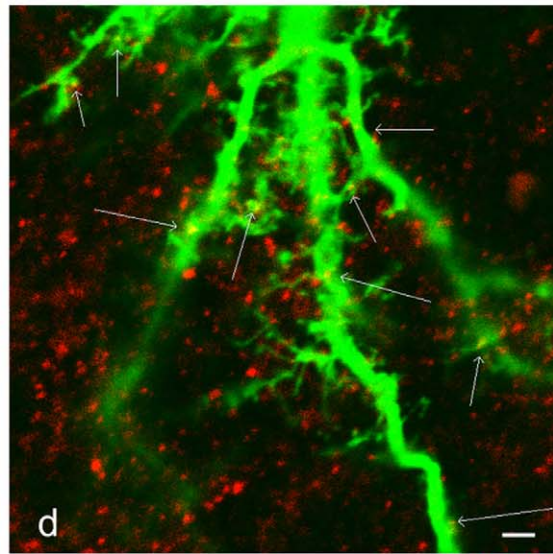

SV2A

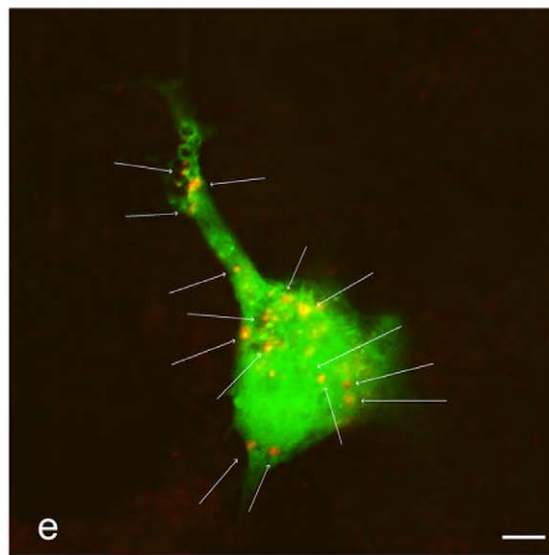

Densin180



### **Supplemental Figure 10 Additional synaptic markers**

a: Immunohistochemistry for Synaptotagmin1 demonstrating the inclusion of immunopositive presynaptic densities within the axons of 14 day old neurons following engraftment into *ex vivo* murine hippocampal cultures. All green fluorescence in Supplemental figure 10 is the eGFP expression from the adenovirally-labeled FACS-purified *Lhx8/Gbx1* transiently overexpressing neurons. All scale bars in Supplemental Figure 10 =5 $\mu$ M

b: Immunohistochemistry for Synaptophysin1 demonstrating the inclusion of immunopositive presynaptic densities within the axons of 14 day old neurons following engraftment into *ex vivo* murine hippocampal cultures.

c: Immunohistochemistry for Bassoon demonstrating the inclusion of immunopositive presynaptic densities within the axons of 14 day old neurons following engraftment into *ex vivo* murine hippocampal cultures.

d: Immunohistochemistry for SV2A demonstrating the inclusion of immunopositive presynaptic densities within the axons of 14 day old neurons following engraftment into *ex vivo* murine hippocampal cultures.

e: Immunohistochemistry for Densin180 demonstrating the inclusion of immunopositive postsynaptic densities within the axons of 14 day old neurons following engraftment into *ex vivo* murine hippocampal cultures.

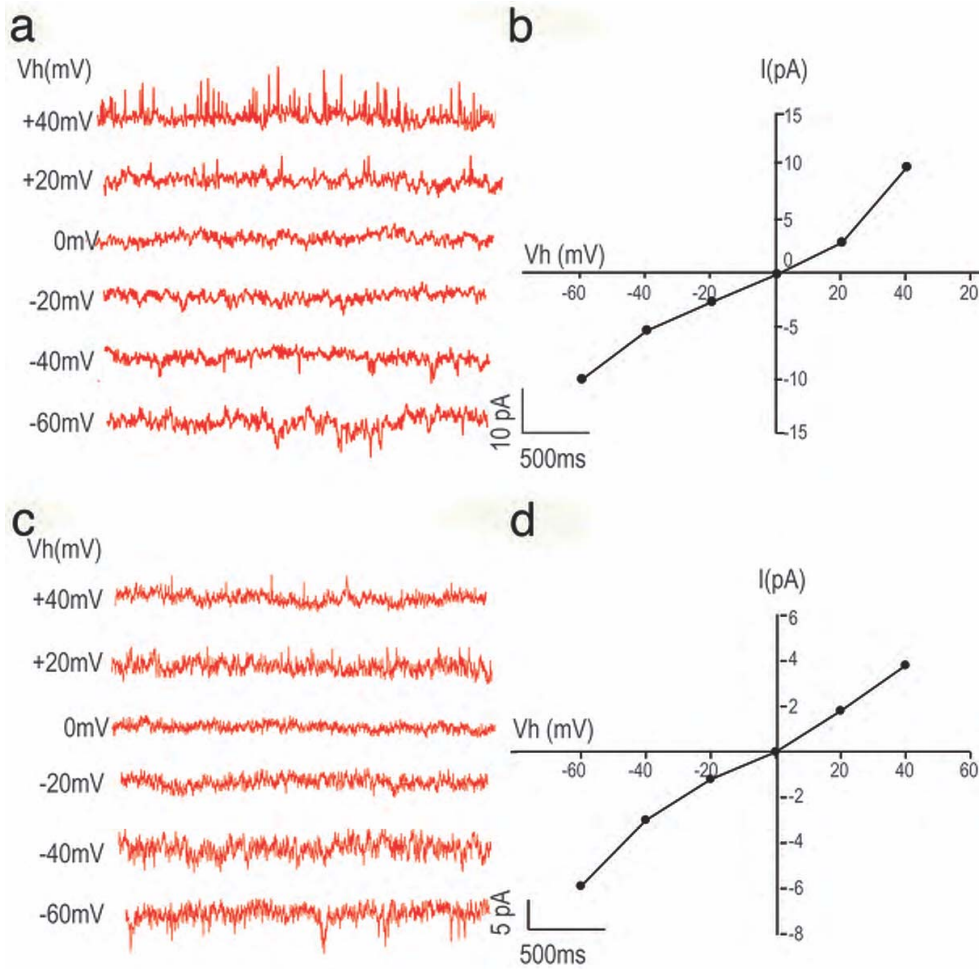

**Supplemental Figure 11 Additional electrophysiology. !**

"#\$%&'(')!(')\*(+'+!, -+' (!.\* / 012' ! ) / 134!) \* - + 505\* - % 0!7!18;4 ('!%5-2!) ' //!1-+) 8 !1!- \* - ! 9 : " !  
';4 ('%5-2!) ' //!5!0<' ! .5) 5-5= ! \* 9! 1! ;4 ('%5-2!) ' //6\$ / 18 ('k' / + 10 0<' 4\*0' - 051 / % 5+5)10' + ! ' ; 0 0\*!  
0<' ! ) , ( ('-0!0 (1)'%a ?<' !454'00' !%\* / , 05\* - ! & 1% ! 6 / / ' + 1650-8) \* - 015-5-2!%\* / , 058+6DEZD' (25) !!  
C5) , ) , //5-%' - %55. ' !#\$%(') \* ('+ + > (\*3!) ' // 5- 718 16 ?<' ! ) , ( ('-0F.\* / 012' !7GHI8!(' / 105\* - %<54J!  
0<' 4' 1K!"#\$ 134/50, +' % 5//, %0 (105-2 0<' !('.' (%1/ 4\*0' - 051/ & 1% 144 (78 5310 / 125)16%!  
&' ('!(') \* ('+ + !5- !4 ('%'-) ' ! \* > ! EG\$ 7ML8L1 - + ! \$ OPQ! 7MLγN86 7+8?<' !GHI! (' / 105\* - %<54! \* > ! 0<' ! " # \$ !  
134/50, +' % ! \* > ! 0<' ! ) 8 / 5 / 4 55) ! 170' + ! ! ('.' (%1/ !4\*0' - 051/ ! - ' 1 (!L!3I6!!!!

| <b>Culture Stage</b>                                                 | <b>Cell Number</b> |
|----------------------------------------------------------------------|--------------------|
| hESC: Beginning RA treatment                                         | 100                |
| hESC: 7 days RA treatment (hESC have ~2 1/3 day doubling time in RA) | 800                |
| Beginning neurospheres following hESC dissociation (70% survival)    | 560                |
| End of Neurosphere Culture (3x sphere radius)                        | 21000              |
| Cells surviving 2 days following nucleofection (70% survival)        | 14733              |
| FACS Positive Cells (50% average GFP+ cells)                         | 7366               |
| BFCN at 19 days (94% ChAT+ / Map+ cells)                             | 6900               |

**Supplemental Table 1** Approximate Cell Number

Approximate number of cells at each step of the protocol for each one hundred starting hESC at the beginning of RA treatment.



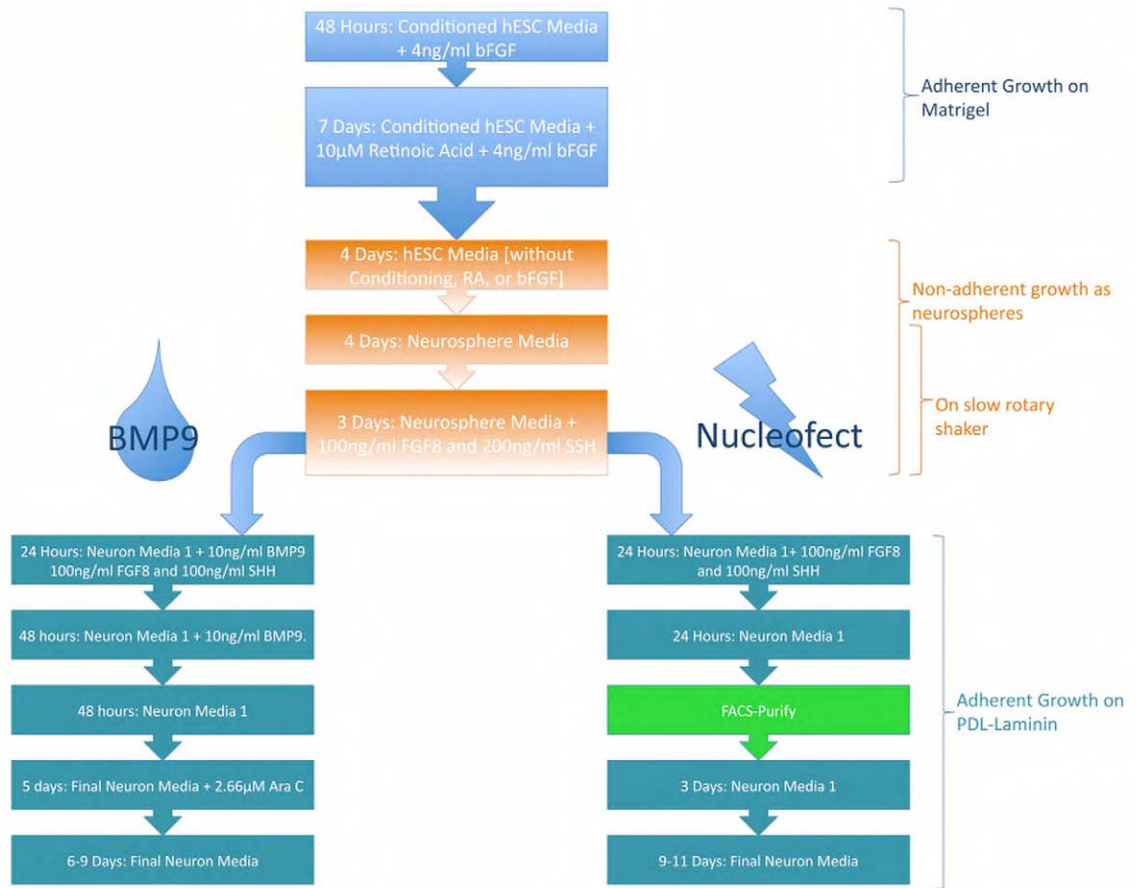

**Supplemental Figure 12 Schematic of the timeline of media transitions**

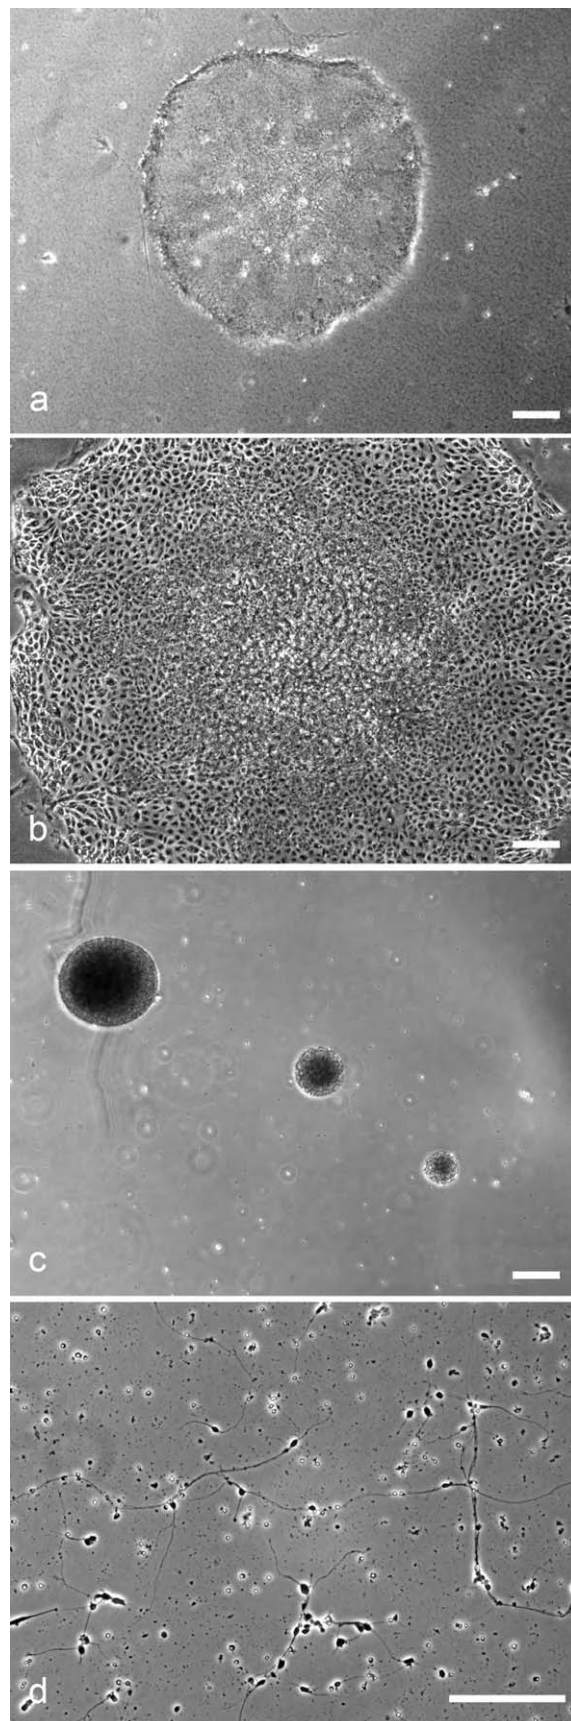

**Supplemental Figure 13 Representative images of cells during differentiation**

a: Typical untreated hESC colony morphology on matrigel. Colonies with a rim of differentiating cells, internal separation between the hESC, or non-circular colony shape were discarded.

b: 10 $\mu$ M retinoic acid treatment alters the morphology of the hESC, generating cells with both larger nuclei and expanded cytoplasm.

c: Neurospheres after 4 days in neurosphere media.

d: Neurons 5 days after FACS-purification.

All scale bars 200 $\mu$ M (

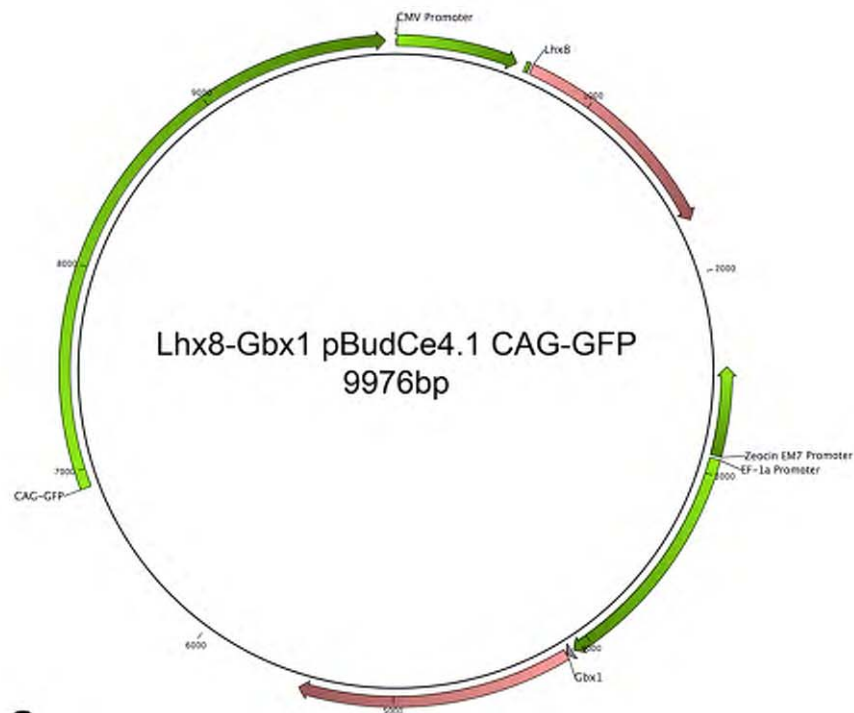

a

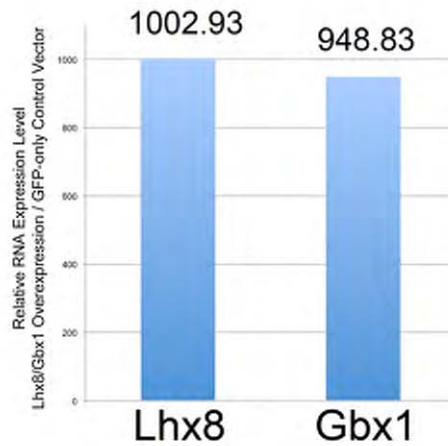

b

### Supplemental Figure 14 Expression vector used for transcription factor overexpression

a: A vector based on the pBudCe4.1 backbone [Invitrogen] was generated to express *Lhx8* from the CMV promoter and *Gbx1* from the EF-1a promoter. A constitutively active CAG-GFP cassette was added into the vector backbone to allow FACS-purification, as either a GFP-fusion construct or IRES sequence could have altered gene function or expression levels.

b: 24 hours after nucleofection, expression levels of *Lhx8* and *Gbx1* increase by 1,002.93x and 948.83x when compared with nucleofection of the GFP-only empty vector control, indicating that all three promoters cause functional transcription in the hNSC used for these experiments.



|                             | <b>Forward</b>                    | <b>Reverse</b>                    |
|-----------------------------|-----------------------------------|-----------------------------------|
| <b>Acetylcholinesterase</b> | GGAACCGCTTCTCCCAAAATTG            | TGCTGTAGTGGTCGAACTGGTTCTTC        |
| <b>β-III Tubulin</b>        | ATCAGCGTCTACTACAACGAGGCC          | CAAAGATGAAATTGTCAGGCCTGAAGAGATGT  |
| <b>CNPase</b>               | AAGATGGACTTGGTCACCTACTTTGGAAAG    | CGTCTTGGGTGTCACAAAGAGGG           |
| <b>ChAT 5'</b>              | TGCCGCCTACTGAGAGCAA               | GTGGCAGGAGTCAAGGTTGGT             |
| <b>ChAT 3'</b>              | CATGAAGCAATACTATGGGCTCTTCTCCTC    | GACGGCGGAAATTAATGACAACATCCAAG     |
| <b>FoxG1</b>                | AGAAGAACGGCAAGTACGAGA             | TGTTGAGGGACAGATTGTGGC             |
| <b>GAD1</b>                 | CCAGAAAAGTGGGGCTCAAGATCTG         | GCAAACAGATTAGAGAAGTCAGTCTCTGTGC   |
| <b>GAPDH</b>                | GAGCACAAGAGGAAGAGAGAGACCC         | GTTGAGCACAGGGTACTTTATTGATGGTACATG |
| <b>Gbx1</b>                 | GCTGGAAGCTGATGAGCTGCT             | CTTCTCCTCATCTGAGCTGTACACCTTC      |
| <b>Gbx1 Endogenous</b>      | GAAACCCCAAGATTGTTGTCCTCCATAC      | CAGATCCCTCGCCTTCCTAAGTCTTG        |
| <b>GFAP</b>                 | CTGGATCTGGAGAGGAAGATTGAGTCG       | CTCATACTGCGTGCGGATCTCTTTCA        |
| <b>Islet1</b>               | TGAAATGTGCGGAGTGTAAATCAGTATTTGGAC | CACACAGCGGAAACACTCGATGTG          |
| <b>Lhx8</b>                 | GTTTCAGAATTGTAGAGCACGCCACAAG      | CTATGCAGCGCAGTTAACATCGTTCC        |
| <b>Lhx8 Endogenous</b>      | GTTACCCCAATTCAATGACACAACCTGCC     | CAGCAAAGTGATGTTGGAATGCTTTAGGTG    |
| <b>Lhx6</b>                 | CACGGCTACATCGAGAGTCAGGTAC         | CAATCTGGCTCCATTTACCTTCTCAC        |
| <b>Nkx2.1</b>               | CTACTGCAACGGCAACCTGGG             | CCATGAAGCGGGAGATGGCG              |
| <b>NOS</b>                  | CAGGCTGTGACTGATGACCACATC          | AGGTCATGTTGGAGATGACCCTTGAG        |
| <b>P75NTR</b>               | GGAGAAAACTCCACAGCGACAGTG          | AGAGCCGTTGAGAAGCTTCTCCAC          |
| <b>Somatostatin</b>         | CAGACTCCGTCAGTTTCTGCAGAAG         | CTTCAGGTTCCAGGGCATCATTCTC         |
| <b>TrkA</b>                 | GAGGTCTCTGTTCAAGTCAACGTCT         | CTCAGTGAAGATGAAGCTGGTCTCATTGA     |
| <b>Tyrosine Hydroxylase</b> | AGTGTCATCACCTGGTCACCAAGTTC        | CTTCAGCGTGGTGTAGACCTCCTT          |
| <b>VGlut1</b>               | GCTACATTGTCACTCAGATTCAGGAGG       | ATCCTCACGAAGATGACACAGCCATAG       |

## Supplemental Table 2 qRT-PCR primer sequences

All primers have a melting temperature of  $60^{\circ}\pm 0.3^{\circ}$ . All primer sets [except GAPDH] span an intron.
